# Supplementary material for: Androgens Accentuate TGF‐β Dependent Erk/Smad Activation During Thoracic Aortic Aneurysm Formation in Marfan Syndrome Male Mice
Source: PubMed Central journal article supplement — J Am Heart Assoc. 2020 Oct 16;9(20):e015773. doi: 10.1161/JAHA.119.015773 (PMC7763370; doi:10.1161/jaha.119.015773), 2020-10-16
Supplement: JAH3-9-e015773-s001.pdf [file JAH3-9-e015773-s001.pdf]

# **Supplemental Material**

**Figure S1. p-Erk1/2 and p-Smad2 signaling in female *Fbn1*<sup>c1039G/+</sup> aortic root/ascending derived smooth muscle cells following hormone treatment.**

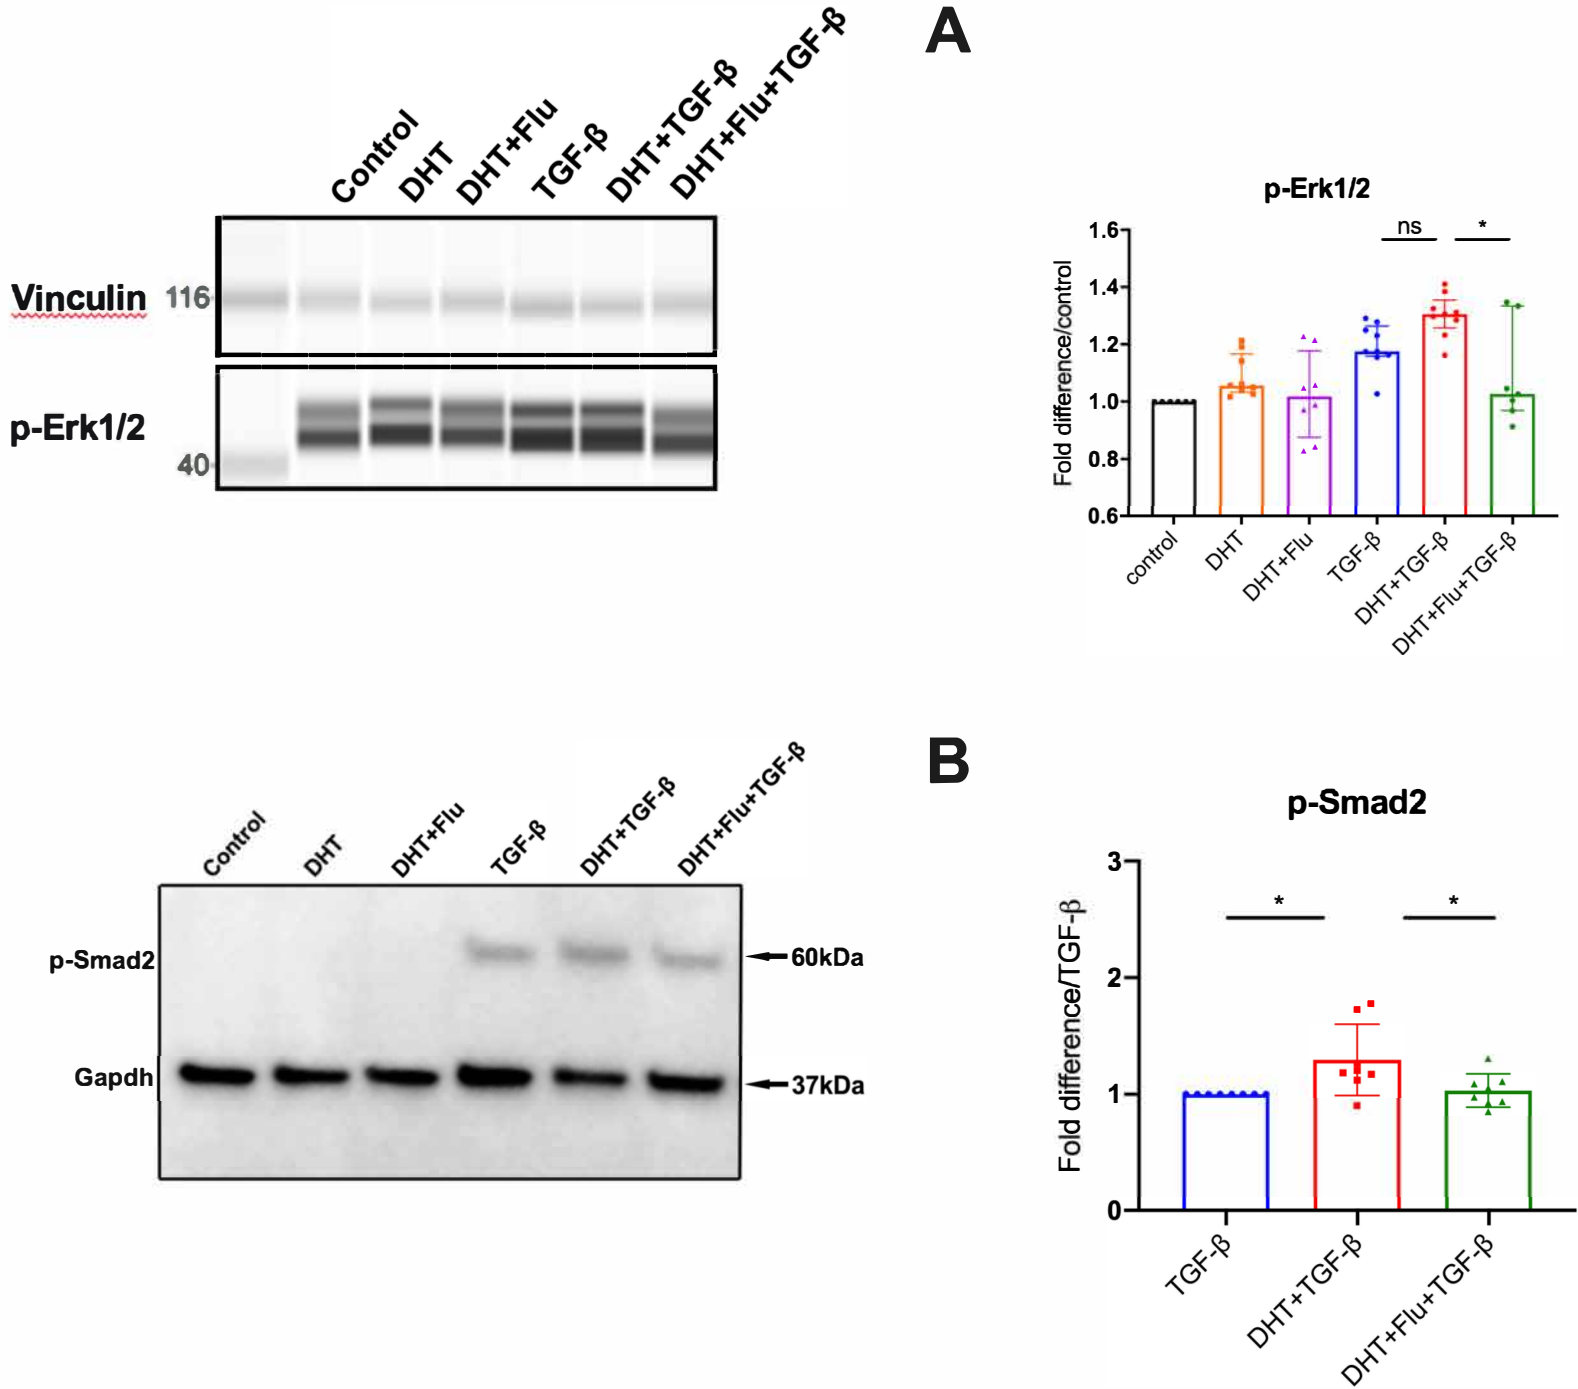

**A** phosphorylated-Erk1/2 (p-Erk1/2) and **B** phosphorylated-Smad2 (p-Smad2) in aortic root/ascending (ASC) aorta derived SMC from *Fbn1*<sup>C1039G/+</sup> (*Fbn1*) female mice treated with dihydrotestosterone 10nM (DHT), DHT + flutamide 1  $\mu$ M (Flu), TGF- $\beta$  5ng/mL, TGF- $\beta$  + DHT, TGF- $\beta$  + DHT + Flu or vehicle control (n=8-9 replicates for each group). Relative protein level quantified using vinculin or Gapdh as loading control as indicated. Values expressed as fold difference compared to control for p-Erk1/2 and fold difference compared to TGF- $\beta$  for p-Smad2. Results presented as median +/-interquartile. Kruskal-Wallis test with Dunn's posttest was used for multiple comparison among the groups: control vs. DHT vs. DHT + Flu, TGF- $\beta$  vs. TGF- $\beta$  + DHT vs. TGF- $\beta$  + DHT + Flu. \* $p \leq 0.05$ .
